# Supplementary material
Source: PubMed Central journal article supplement (PMC2995446)
Supplement: NIHMS219846-supplement-Supp_Table_S1.pdf [file NIHMS219846-supplement-Supp_Table_S1.pdf]

| Disease | Gender | Age     | stimulated (ml/min) | unstimulated (ml/min) | disease duration (months) | SS-A             | SS-B |
|---------|--------|---------|---------------------|-----------------------|---------------------------|------------------|------|
| pSS     | F      | 44      | 0.31                | 0.01                  | 10                        | pos              | neg  |
| pSS     | F      | 69      | 0.36                | 0.09                  | 12                        | neg              | neg  |
| pSS     | F      | 35      | 0.27                | 0.07                  | 29                        | pos              | neg  |
| pSS     | F      | 23      | 0.35                | 0.11                  | 17                        | pos              | pos  |
| pSS     | F      | 24      | 0.21                | 0.08                  | 65                        | pos              | pos  |
| pSS     | F      | 42      | 0.31                | 0.08                  | 22                        | neg              | neg  |
| pSS     | F      | 71      | 0.16                | 0.02                  | 21                        | pos              | pos  |
| pSS     | F      | 74      | 1                   | 0.03                  | 16                        | neg              | neg  |
| pSS     | F      | 52      | 0.28                | 0                     | 24                        | pos              | pos  |
| pSS     | F      | 29      | 1.97                | 0.43                  | 13                        | pos              | neg  |
| pSS     | F      | 44      | 0.47                | 0.24                  | 6                         | pos              | pos  |
| pSS     | F      | 52      | 2.08                | 0.52                  | 156                       | pos              | neg  |
| pSS     | F      | 24      | 0.68                | 0.09                  | 69                        | pos              | neg  |
| pSS     | F      | 40      | 1.09                | 0.55                  | 17                        | pos              | neg  |
| pSS     | F      | 30      | 0.1                 | 0                     | 24                        | pos              | pos  |
| pSS     | F      | 35      | 1                   | 0.52                  | 144                       | pos              | neg  |
| pSS     | F      | 52      | 0.26                | 0.07                  | 23                        | pos              | neg  |
| pSS     | F      | 41      | 0.2                 | 0.03                  | 103                       | pos              | pos  |
| pSS     | F      | 31      | 2.49                | 0.3                   | 4                         | pos              | pos  |
| pSS     | F      | 39      | 0.26                | 0.04                  | 20                        | pos              | pos  |
| pSS     | F      | 43      | 0.42                | 0.06                  | 105                       | pos              | pos  |
| pSS     | F      | 56      | 0.45                | 0.11                  | 34                        | pos              | pos  |
| pSS     | F      | 55      | 1.32                | 0.24                  | 36                        | pos              | neg  |
| pSS     | F      | 70      | 0.37                | 0.3                   | 36                        | pos              | pos  |
| pSS     | F      | 37      | 0.3                 | 0.02                  | 220                       | pos              | neg  |
| pSS     | F      | 32      | 0.96                | 0.15                  | 65                        | pos              | pos  |
| pSS     | F      | 37      | 0.09                | 0.04                  | 23                        | pos              | neg  |
| pSS     | F      | 67      | 0.25                | 0                     | 38                        | pos              | pos  |
| pSS     | F      | 57      | 0.16                | 0                     | 136                       | pos              | neg  |
| pSS     | F      | 66      | 0.69                | 0                     | 123                       | pos              | pos  |
| pSS     | F      | 59      | 0.3                 | 0.09                  | 2                         | pos              | pos  |
| pSS     | F      | 56      | 0.082               | 0.024                 | 6                         | pos              | pos  |
| pSS     | F      | 65      | 0.442               | 0.01                  | 58                        | pos              | neg  |
| pSS     | F      | 59      | 0.884               | 0.04                  | 21                        | pos              | pos  |
| Mean    |        | 47 ± 15 | 0,60 ± 0,6          | 0,13 ± 0,16           | 50 (range 2 -220)         |                  |      |
|         |        |         |                     |                       |                           | Early (<4 years) | n=23 |
|         |        |         |                     |                       |                           | Late (>4 years)  | n=11 |

| Disease | Gender | Age    | stimulated (ml/min) |
|---------|--------|--------|---------------------|
| control | F      | 48     | 1.41                |
| control | F      | 35     | 0.93                |
| control | F      | 37     | 1.06                |
| control | F      | 39     | 1.61                |
| control | F      | 29     | 1.24                |
| control | F      | 55     | 1.08                |
| control | F      | 42     | 1.56                |
| control | F      | 39     | 1.92                |
| control | F      | 42     | 2.75                |
| control | F      | 42     | 1.12                |
| control | F      | 29     | 1.5                 |
| control | F      | 28     | 2.11                |
| control | F      | 43     | 1.56                |
| control | F      | 52     | 0.98                |
| control | F      | 28     | 1.53                |
| control | F      | 38     | 1.82                |
| control | F      | 19     | 0.51                |
| control | F      | 37     | 1.28                |
| control | F      | 37     | 1.37                |
| control | F      | 52     | 1.2                 |
| control | F      | 58     | 1.36                |
| control | F      | 32     | 0.87                |
| control | F      | 32     | 1.34                |
| control | F      | 58     | 0.98                |
| control | F      | 48     | 0.724               |
| control | F      | 49     | 1.046               |
| control | F      | 39     | 1.292               |
| control | F      | 36     | 0.616               |
| control | F      | 29     | 0.652               |
| control | F      | 43     | 0.658               |
| control | F      | 40     | 1.346               |
| control | F      | 45     | 1.724               |
| control | F      | 49     | 1.04                |
| control | F      | 53     | 1.312               |
| Mean    |        | 41 ± 9 | 1,28 ± 0,46         |

| Disease | gender | Age     | stimulated (ml/min) | unstimulated (ml/min) | disease duration (months) | SS-A | SS-B |
|---------|--------|---------|---------------------|-----------------------|---------------------------|------|------|
| SLE     | F      | 61      | 0.5                 | 0.208                 | 274                       | pos  | neg  |
| SLE     | F      | 39      | 0.33                | 0.1                   | 99                        | pos  | pos  |
| SLE     | F      | 63      | 0.76                | 0.14                  | 334                       | pos  | neg  |
| SLE     | F      | 49      | 0.61                | 0.11                  | 107                       | pos  | neg  |
| SLE     | F      | 75      | 0.44                | 0.21                  | 250                       | neg  | neg  |
| SLE     | F      | 29      | 0.71                | 0.25                  | 96                        | neg  | neg  |
| SLE     | F      | 36      | 0.83                | 0.18                  | 36                        | pos  | neg  |
| SLE     | F      | 24      | 1.17                | 0.12                  | 41                        | neg  | neg  |
| SLE     | F      | 58      | 0.42                | 0.17                  | 455                       | neg  | neg  |
| SLE     | F      | 52      | 0.4                 | 0.38                  | 82                        | neg  | neg  |
| SLE     | F      | 64      | 0.46                | 0.03                  | 131                       | pos  | neg  |
| SLE     | F      | 68      | 1.06                | 0.64                  | 286                       | pos  | neg  |
| SLE     | F      | 24      | 1.22                | 0.36                  | 11                        | neg  | neg  |
| SLE     | F      | 54      | 0.40                | 0.14                  | 239                       | pos  | neg  |
| SLE     | F      | 44      | N/A                 | N/A                   | 167                       | pos  | neg  |
| SLE     | F      | 46      | 0.42                | 0.06                  | 191                       | neg  | neg  |
| SLE     | F      | 48      | 0.34                | 0.09                  | 215                       | neg  | neg  |
| SLE     | F      | 41      | N/A                 | N/A                   | 62                        | pos  | neg  |
| SLE     | F      | 57      | 0.2                 | 0.05                  | 95                        | neg  | neg  |
| SLE     | F      | 75      | 0.13                | 0.06                  | 227                       | neg  | neg  |
| SLE     | F      | 45      | 0.88                | 0.13                  | 192                       | pos  | pos  |
| SLE     | F      | 29      | 0.94                | 0.67                  | 171                       | neg  | neg  |
| SLE     | F      | 31      | 0.81                | 0.29                  | 28                        | neg  | neg  |
| SLE     | F      | 45      | 1.21                | 0.41                  | 19                        | pos  | neg  |
| SLE     | F      | 65      | 0.28                | 0.05                  | 215                       | neg  | neg  |
| SLE     | F      | 40      | 1.17                | 0.3                   | 83                        | neg  | neg  |
| SLE     | F      | 32      | 0.6                 | 0.22                  | 252                       | neg  | neg  |
| SLE     | F      | 53      | 0.56                | 0.04                  | 131                       | pos  | neg  |
| SLE     | F      | 21      | 0.64                | 0.34                  | 12                        | pos  | pos  |
| SLE     | F      | 26      | 0.91                | 0.13                  | 57                        | neg  | neg  |
| SLE     | F      | 38      | 0.74                | 0.3                   | 59                        | neg  | neg  |
| SLE     | F      | 47      | 1.11                | 0.25                  | 252                       | pos  | neg  |
| SLE     | F      | 28      | 0.3                 | 0.06                  | 25                        | pos  | neg  |
| SLE     | F      | 59      | 1.17                | 0.18                  | 288                       | pos  | neg  |
| Mean    |        | 46 ± 15 | 0,68 ± 0,3          | 0,21 ± 0,16           | 152 (range 11-455)        |      |      |
